# Supplementary material for: Phytocomplex Characterization and Biological Evaluation of Powdered Fruits and Leaves from Elaeagnus angustifolia
Source: PubMed Central journal article supplement (PMC7248930; doi:10.3390/molecules25092021), 2020-04-26
Supplement: molecules-25-02021-s001.pdf [file molecules-25-02021-s001.pdf]

## Supplementary Materials

Simone Carradori <sup>1,\*</sup>, Francesco Cairone <sup>2</sup>, Stefania Garzoli <sup>2</sup>, Giancarlo Fabrizi <sup>2</sup>,  
 Antonia Iazzetti <sup>2</sup>, Anna Maria Giusti <sup>3</sup>, Luigi Menghini <sup>1</sup>, Sengul Uysal <sup>4,5</sup>, Gunes Ak <sup>6</sup>,  
 Gokhan Zengin <sup>6</sup> and Stefania Cesa <sup>2,\*</sup>

- <sup>1</sup> Department of Pharmacy, University “G. d’Annunzio” of Chieti-Pescara, Chieti 66100, Italy; luigi.menghini@unich.it
  - <sup>2</sup> Department of Drug Chemistry and Technologies, “Sapienza” University of Rome, 00185 Rome, Italy; francesco.cairone@uniroma1.it (F.C.); stefania.garzoli@uniroma1.it (S.G.); giancarlo.fabrizi@uniroma1.it (G.F.); antonia.iazzetti@uniroma1.it (A.I.)
  - <sup>3</sup> Department of Experimental Medicine, “Sapienza” University of Rome, 00185 Rome, Italy; annamaria.giusti@uniroma1.it
  - <sup>4</sup> Erciyes University Halil Bayraktar Health Services Vocational College, Kayseri 38039, Turkey; sennguluyisal@gmail.com
  - <sup>5</sup> Ziya Eren Drug Application and Research Center, Erciyes University, Kayseri 38039, Turkey;
  - <sup>6</sup> Department of Biology, Science Faculty, Selcuk University, Konya 42130, Turkey; akguneselcuk@gmail.com (G.A.); gokhanzengin@selcuk.edu.tr (G.Z.)
- \* Correspondence: simone.carradori@unich.it (Simone Carradori) and stefania.cesa@uniroma1.it (Stefania Cesa)

Academic Editor: Ericsson Coy-Barrera

Received: 25 March 2020; Accepted: 22 April 2020; Published: date

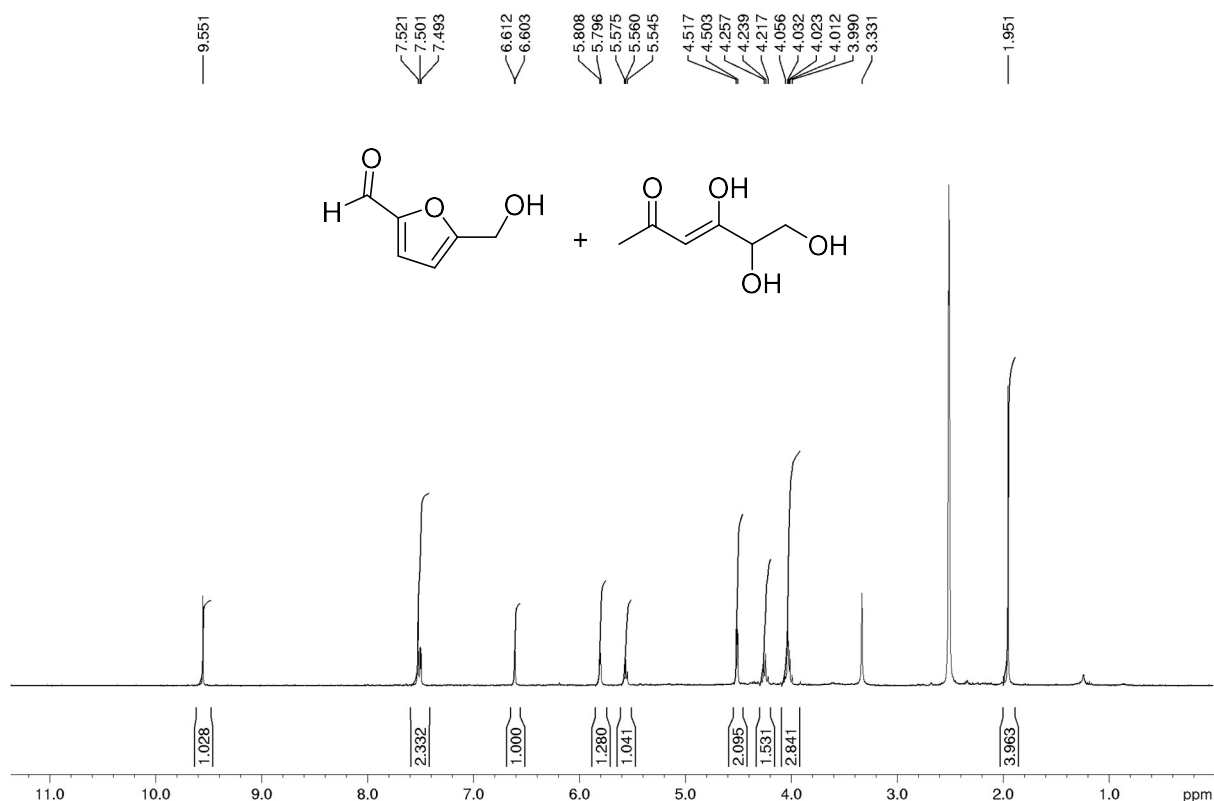

**Figure S1.** <sup>1</sup>H NMR (400.13 MHz) DMSO-*d*<sub>6</sub> (*F*<sub>s</sub> sample).

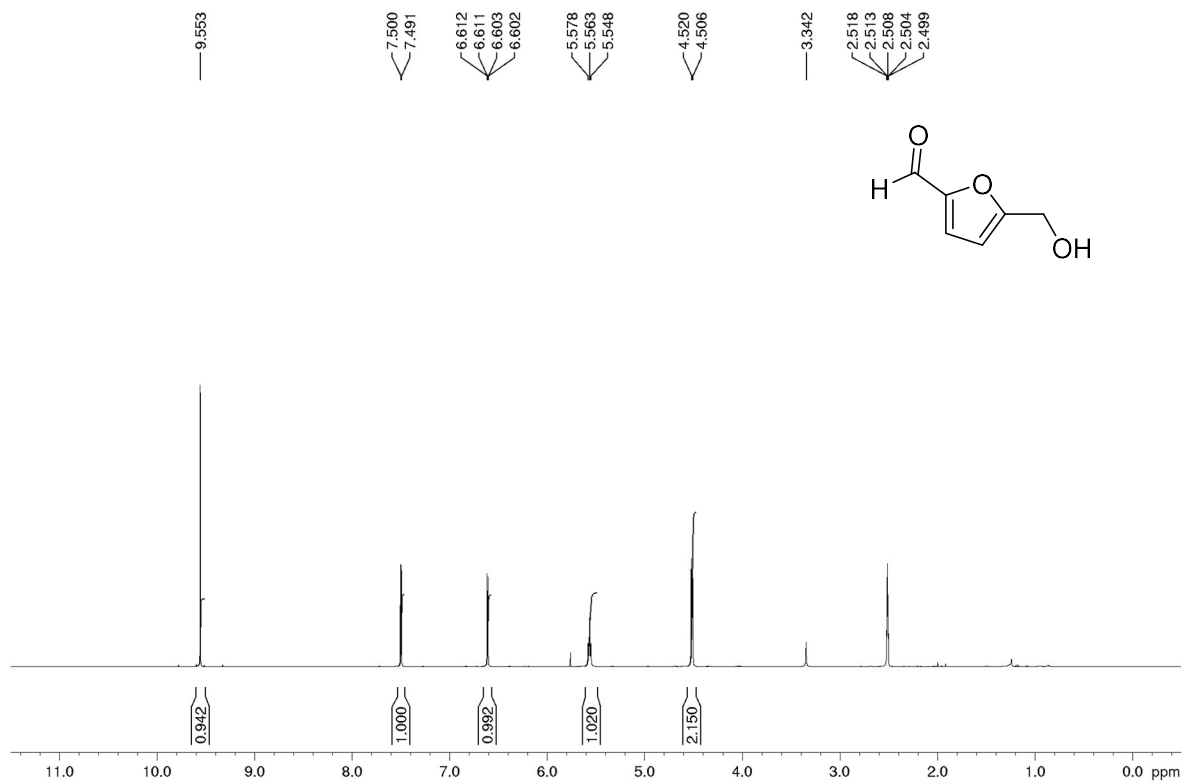

Figure S2.  $^1\text{H}$  NMR (400.13 MHz)  $\text{DMSO-}d_6$  (5-(hydroxymethyl)furfural).

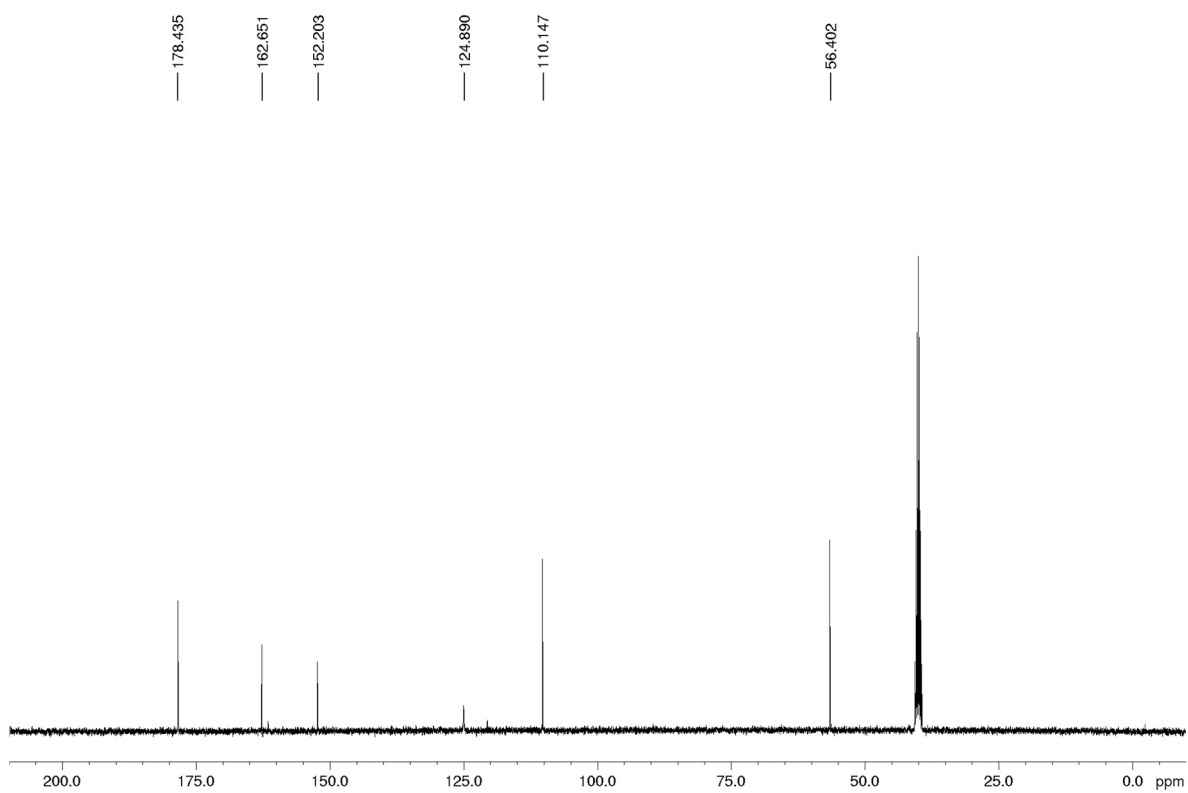

Figure S3.  $^{13}\text{C}$  NMR (100.03 MHz)  $\text{DMSO-}d_6$ .

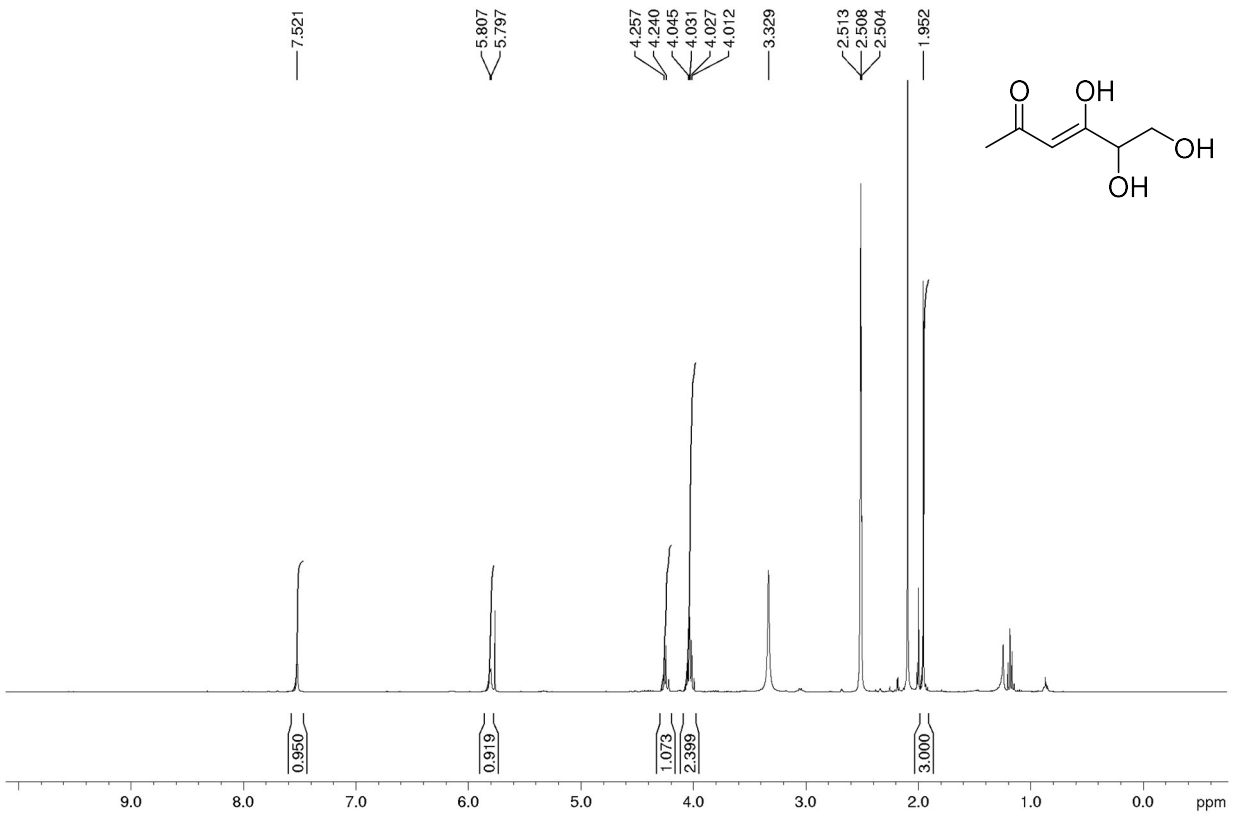

Figure S4.  $^1\text{H}$  NMR (400.13 MHz)  $\text{DMSO-}d_6$  (4,5,6-Trihydroxyhex-3-en-2-one).

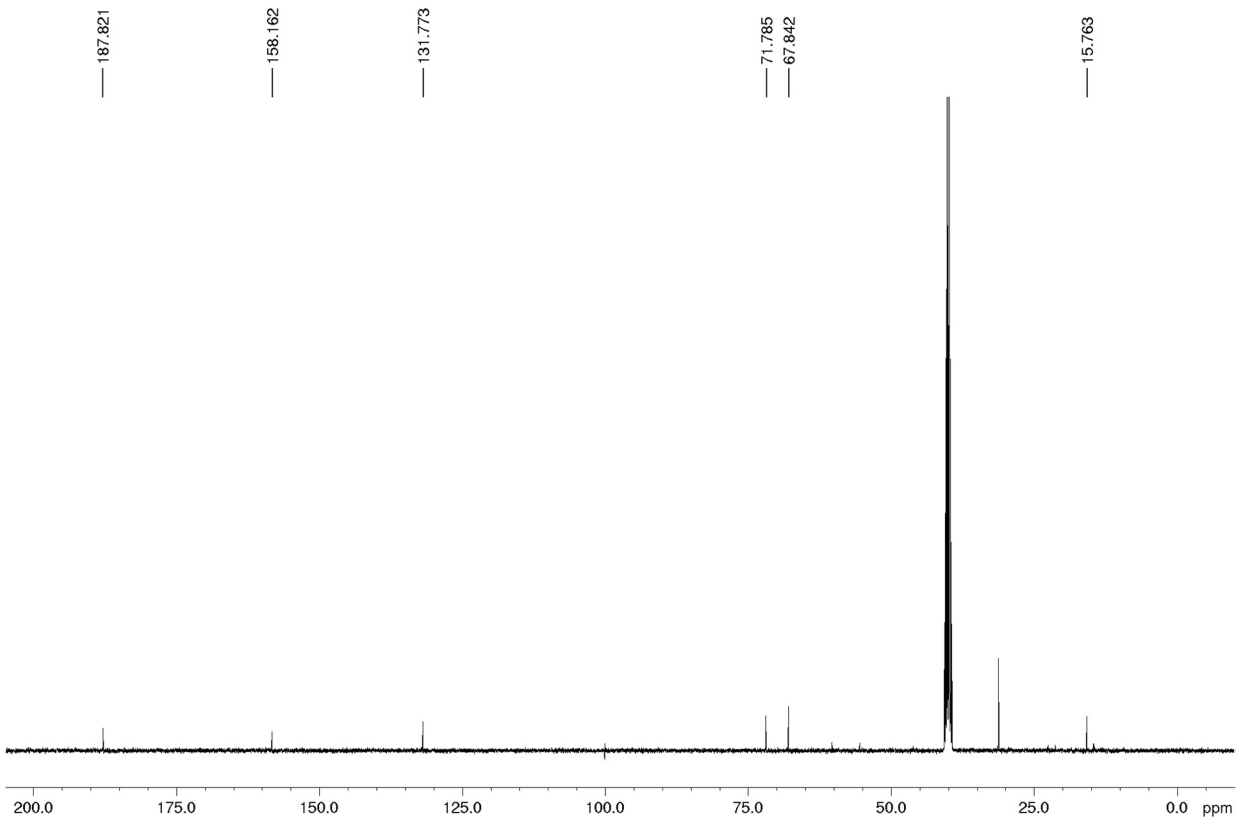

Figure S5.  $^{13}\text{C}$  NMR (100.03 MHz)  $\text{DMSO-}d_6$ .

Figure S6. MASS SPECTRUM OF 5-HYDROXYMETHYLFURFURAL.

2.81e9

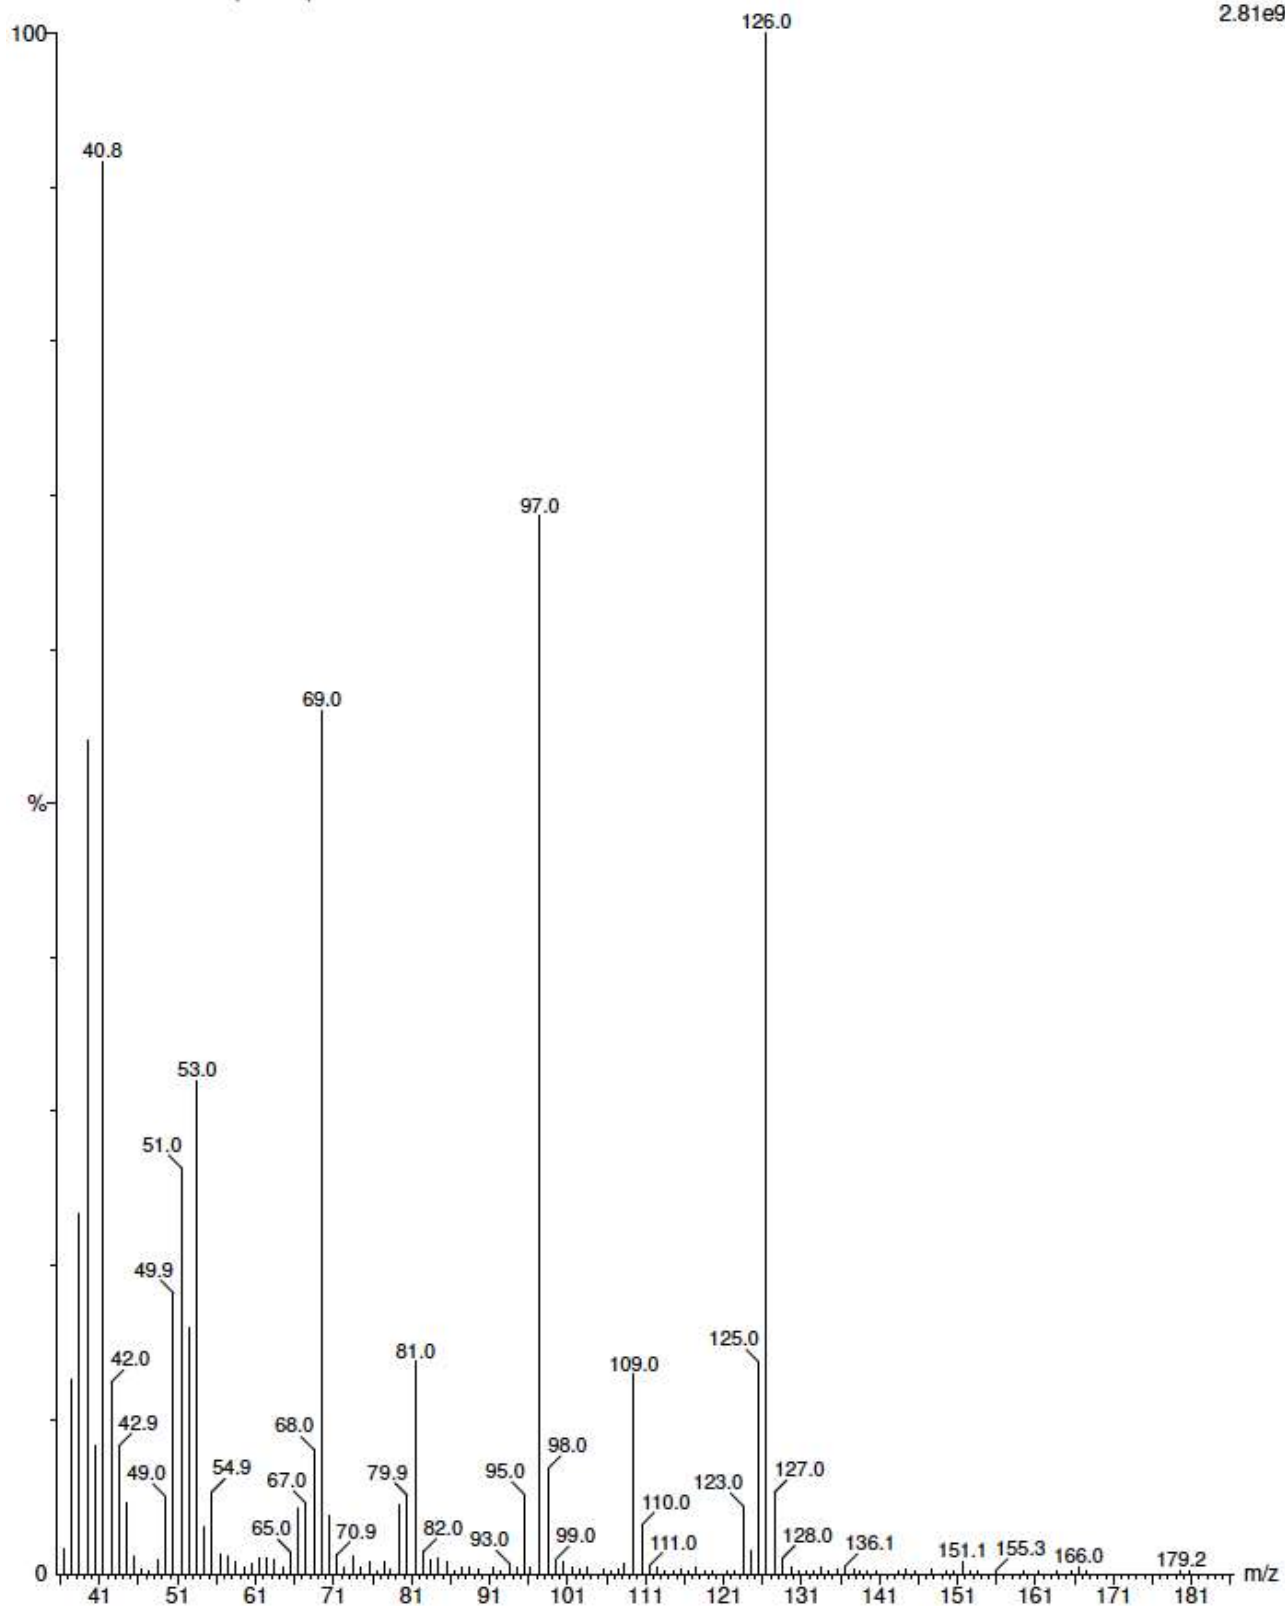

Figure S7. MASS SPECTRUM OF 2-FURANMETHANOL.

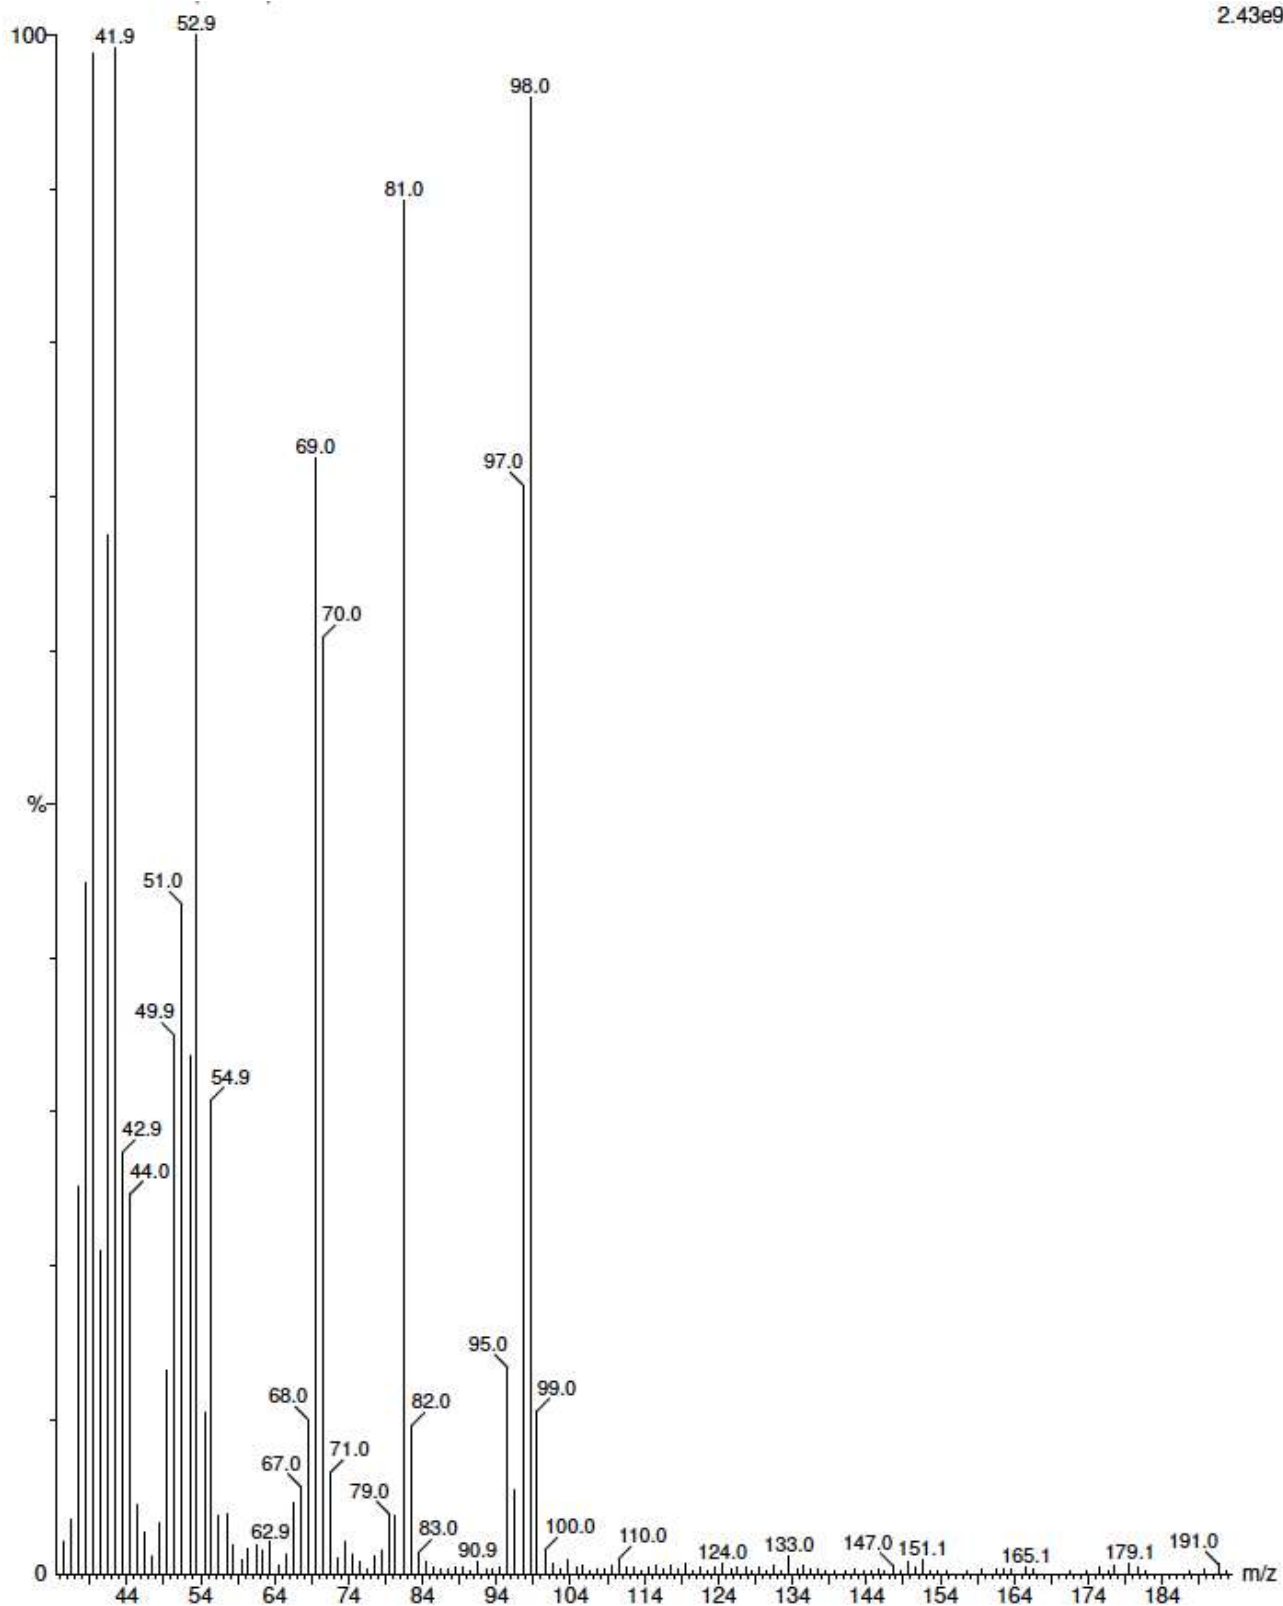

**Figure S8.** MASS SPECTRUM OF 5-METHYL FURFURAL.

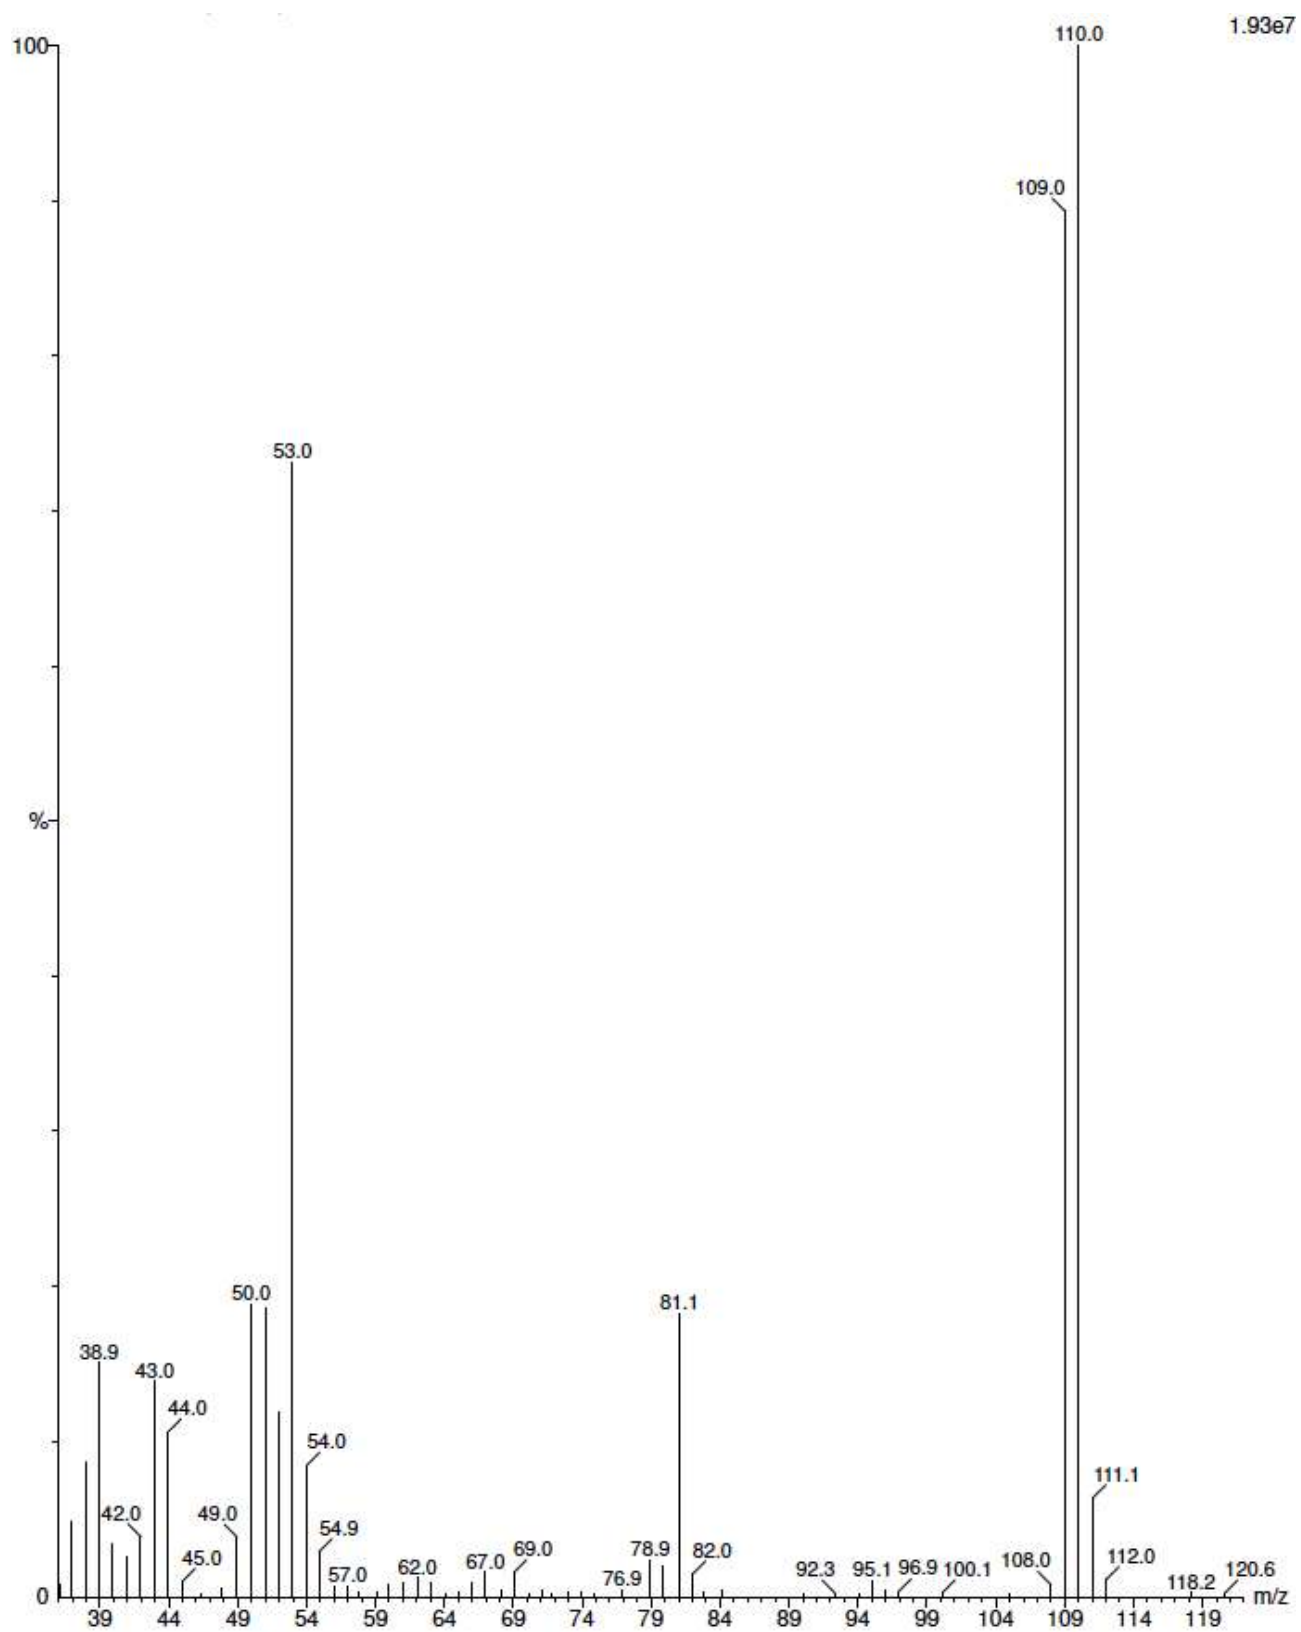

**Figure S9.** MASS SPECTRUM OF *FURFURAL*.

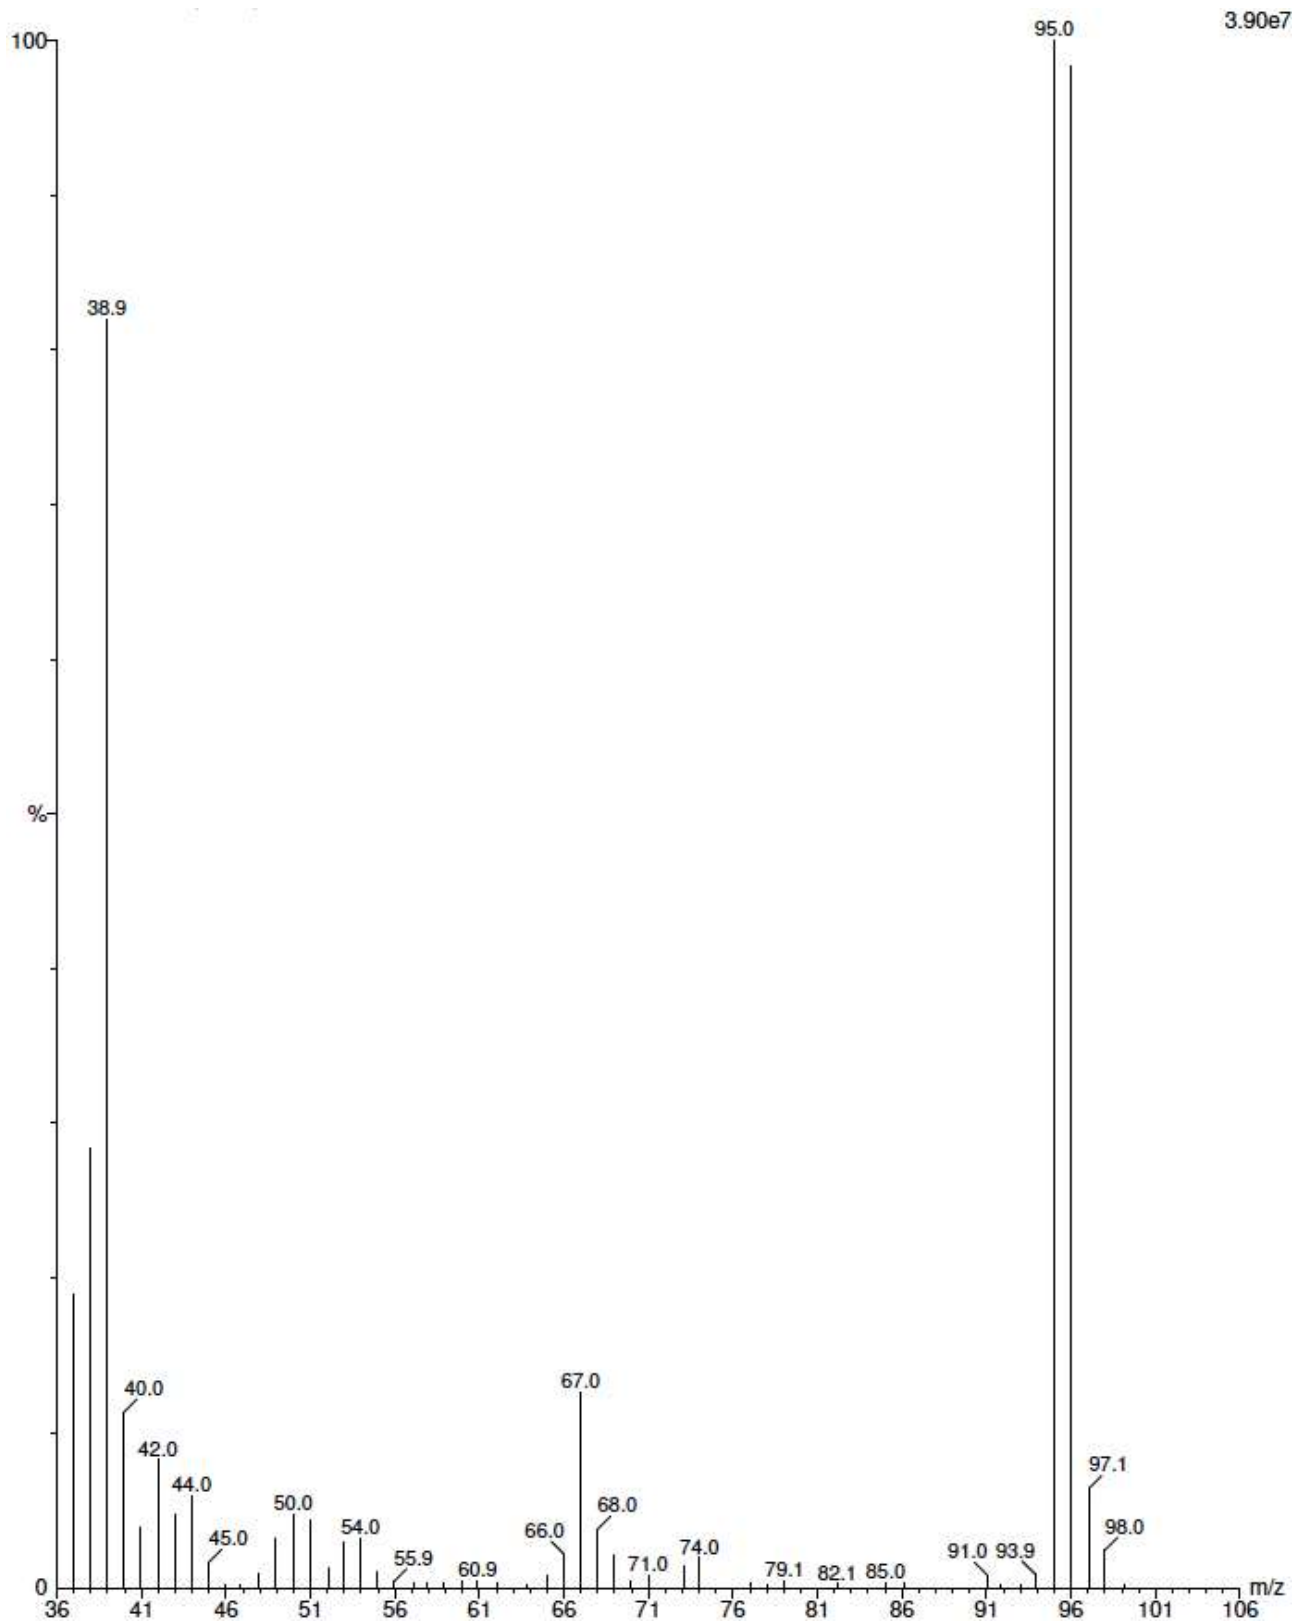

**Figure S10.** MASS SPECTRUM OF ACETIC ACID.

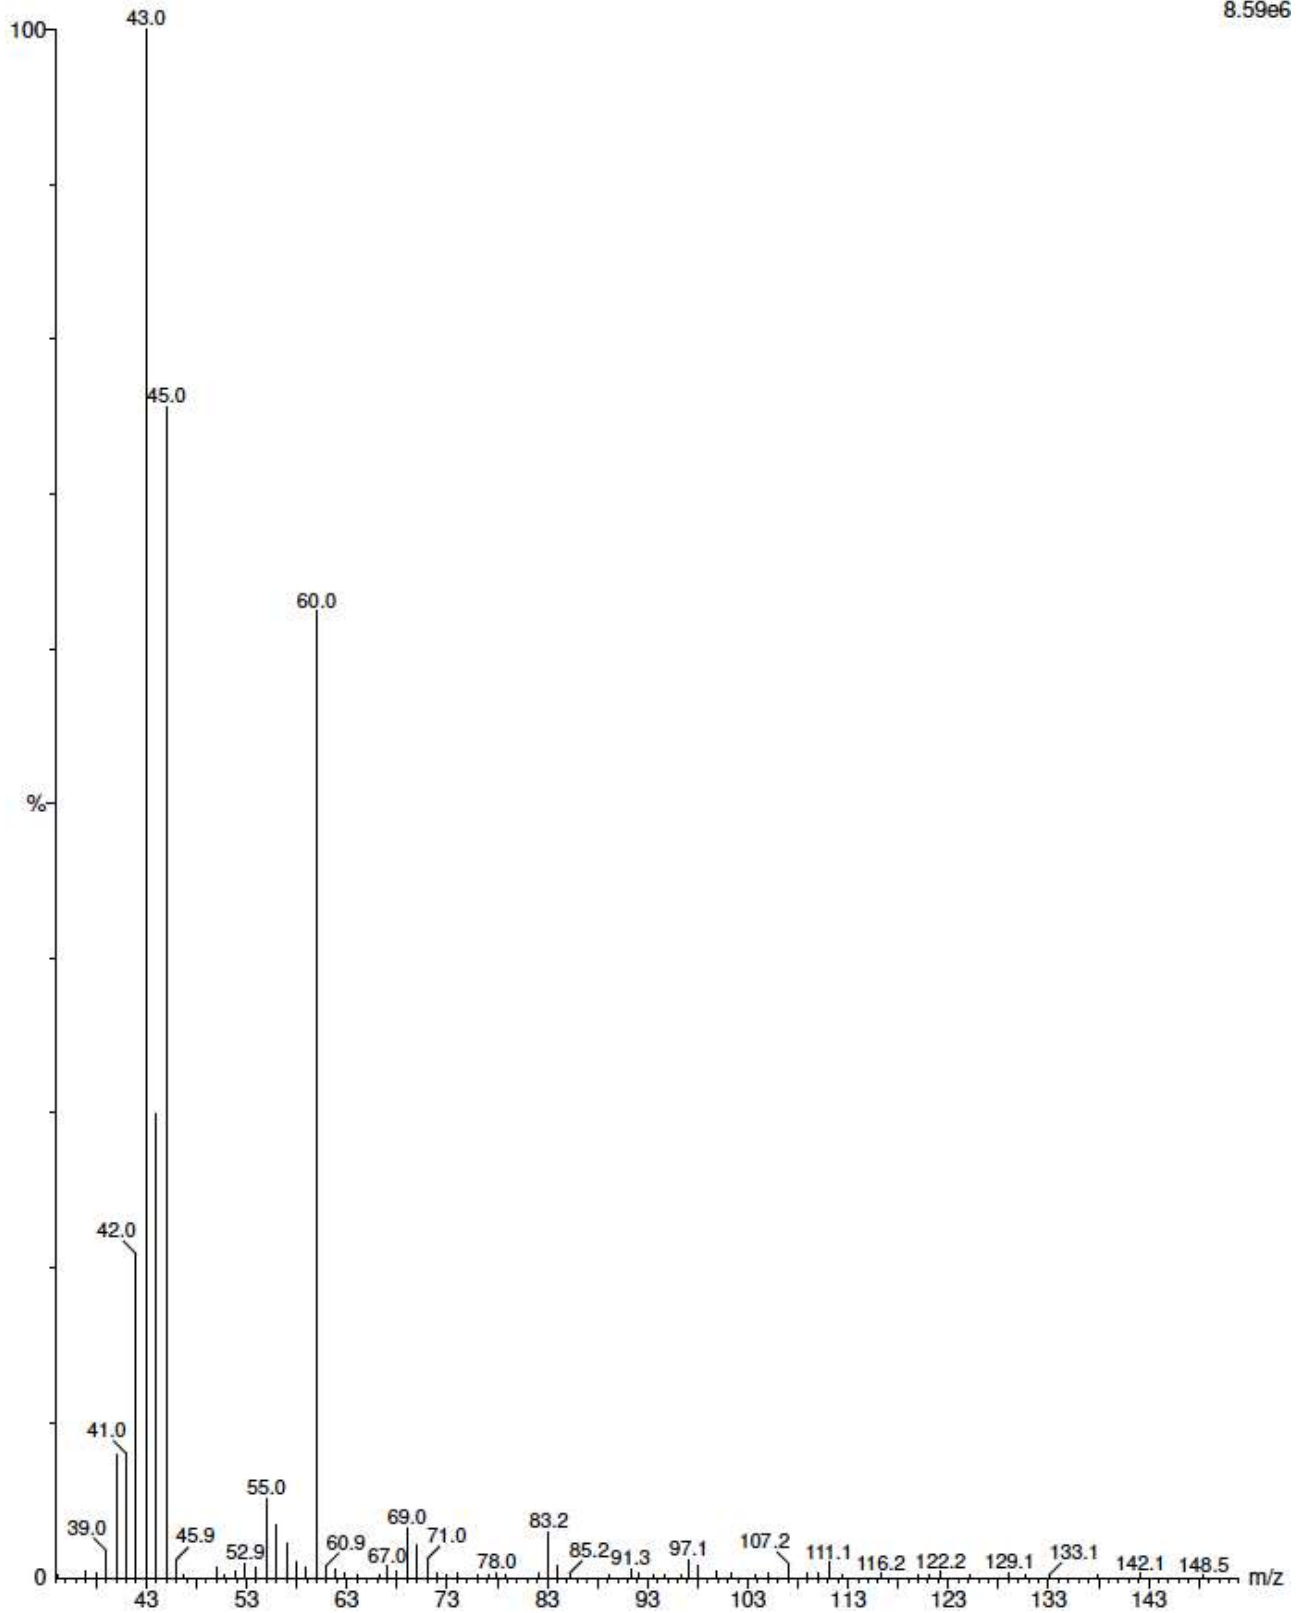

**Figure S11.** MASS SPECTRUM OF ACETOL.



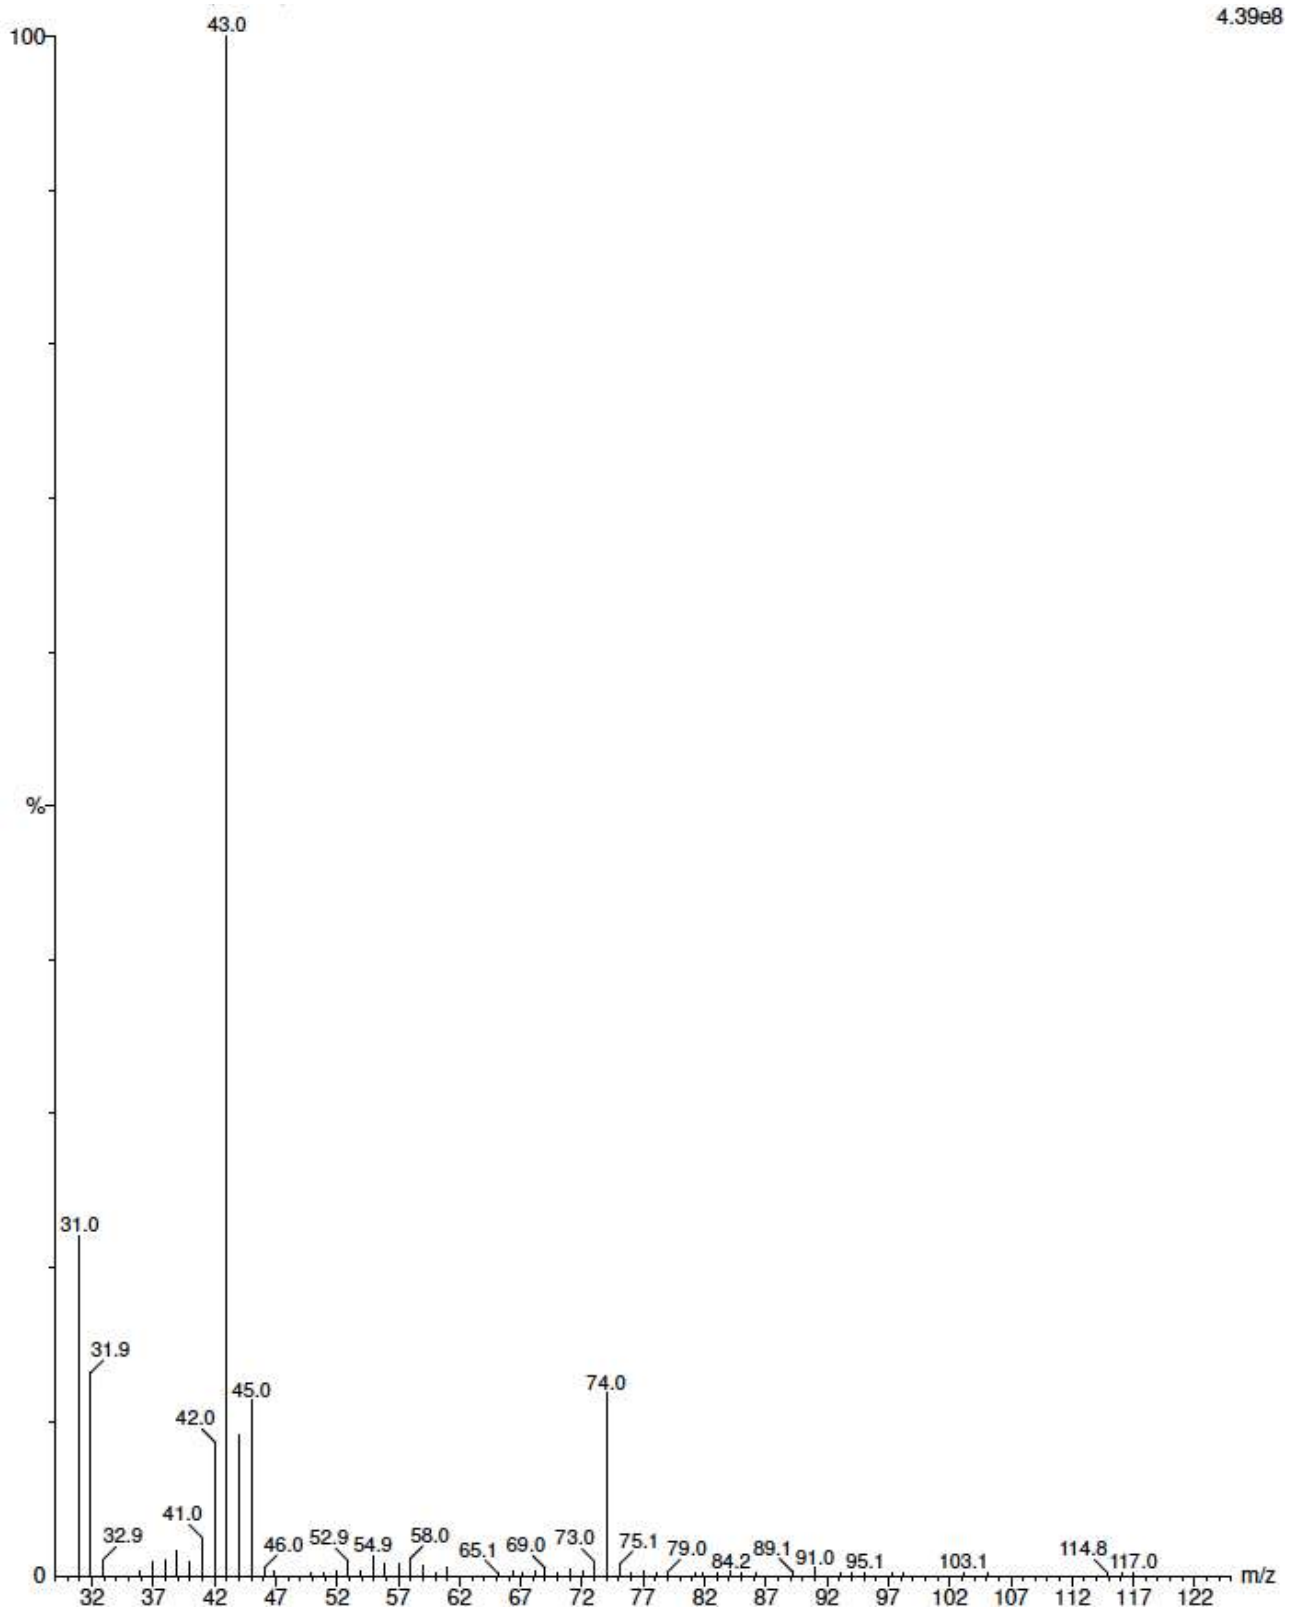

Figure S12. MASS SPECTRUM OF *P*-VINYLGUAIACOL.

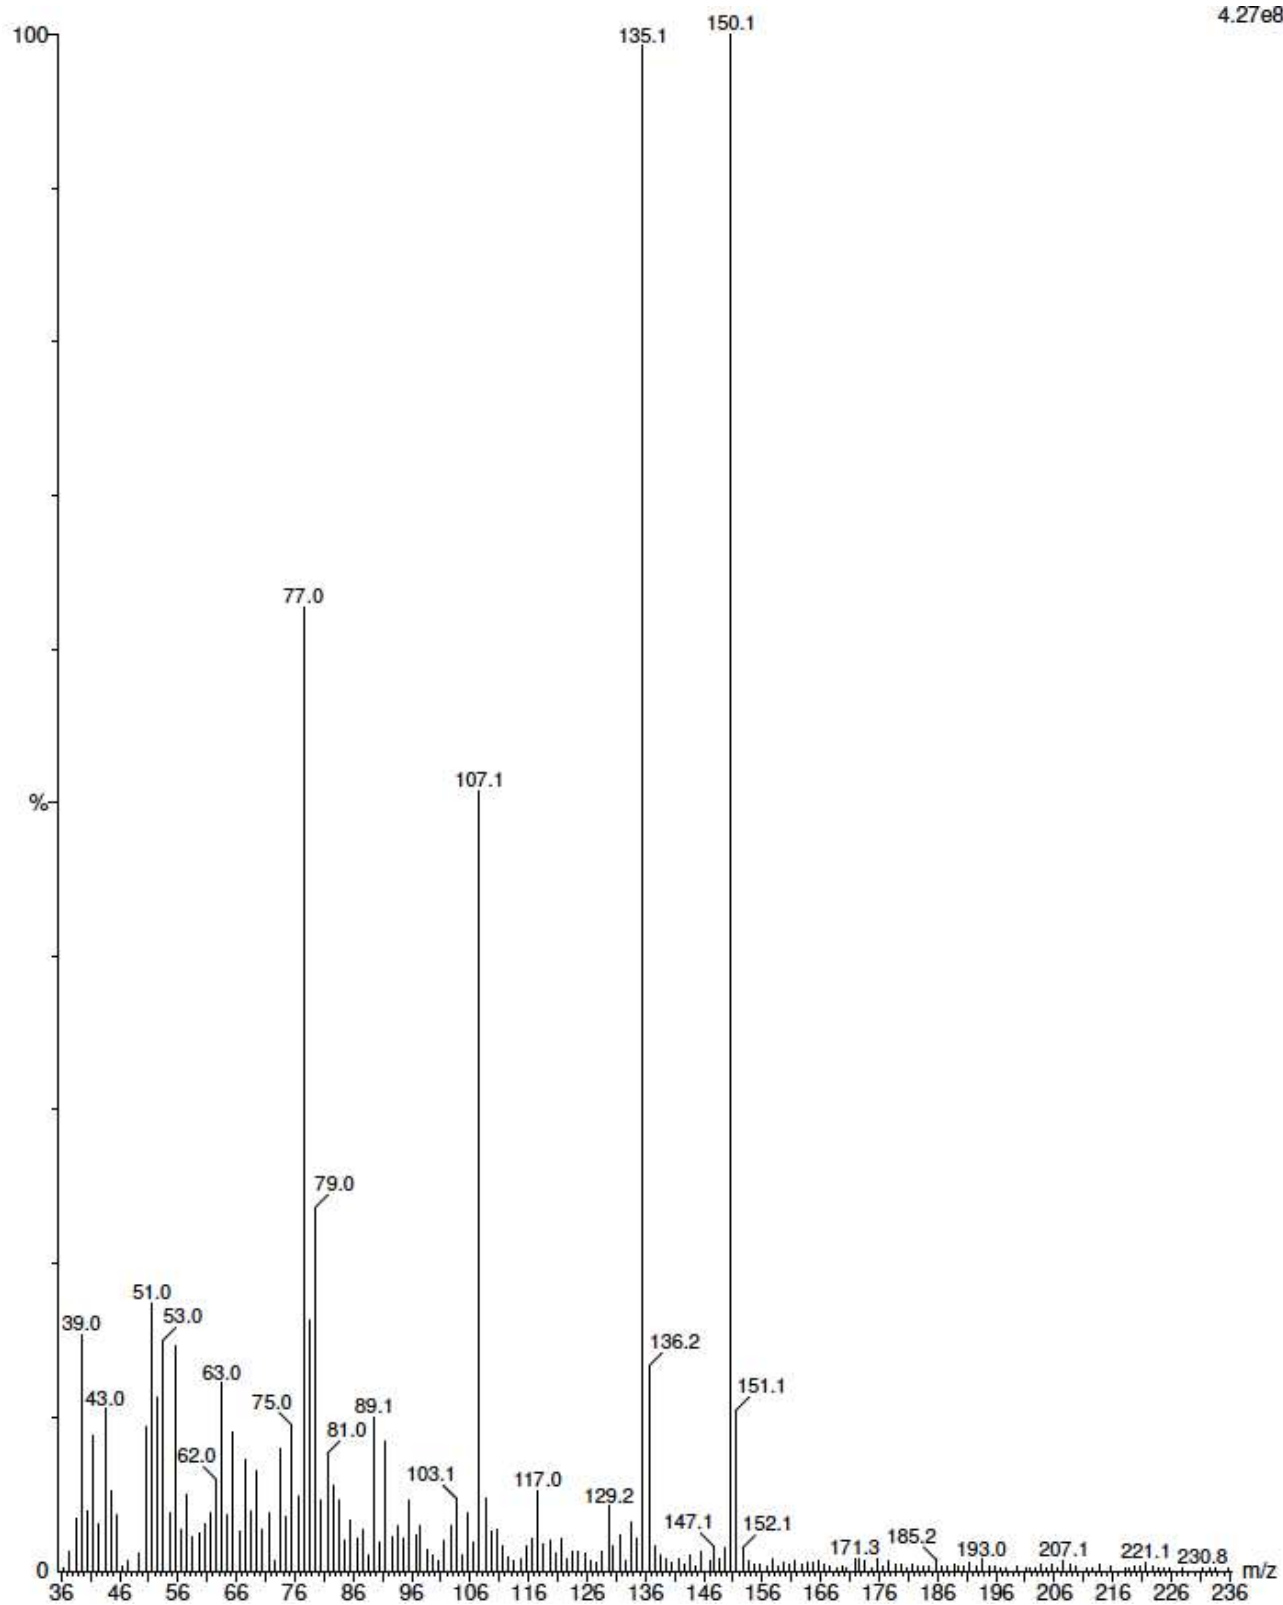

**Figure S13.** MASS SPECTRUM OF *PYRANONE*.

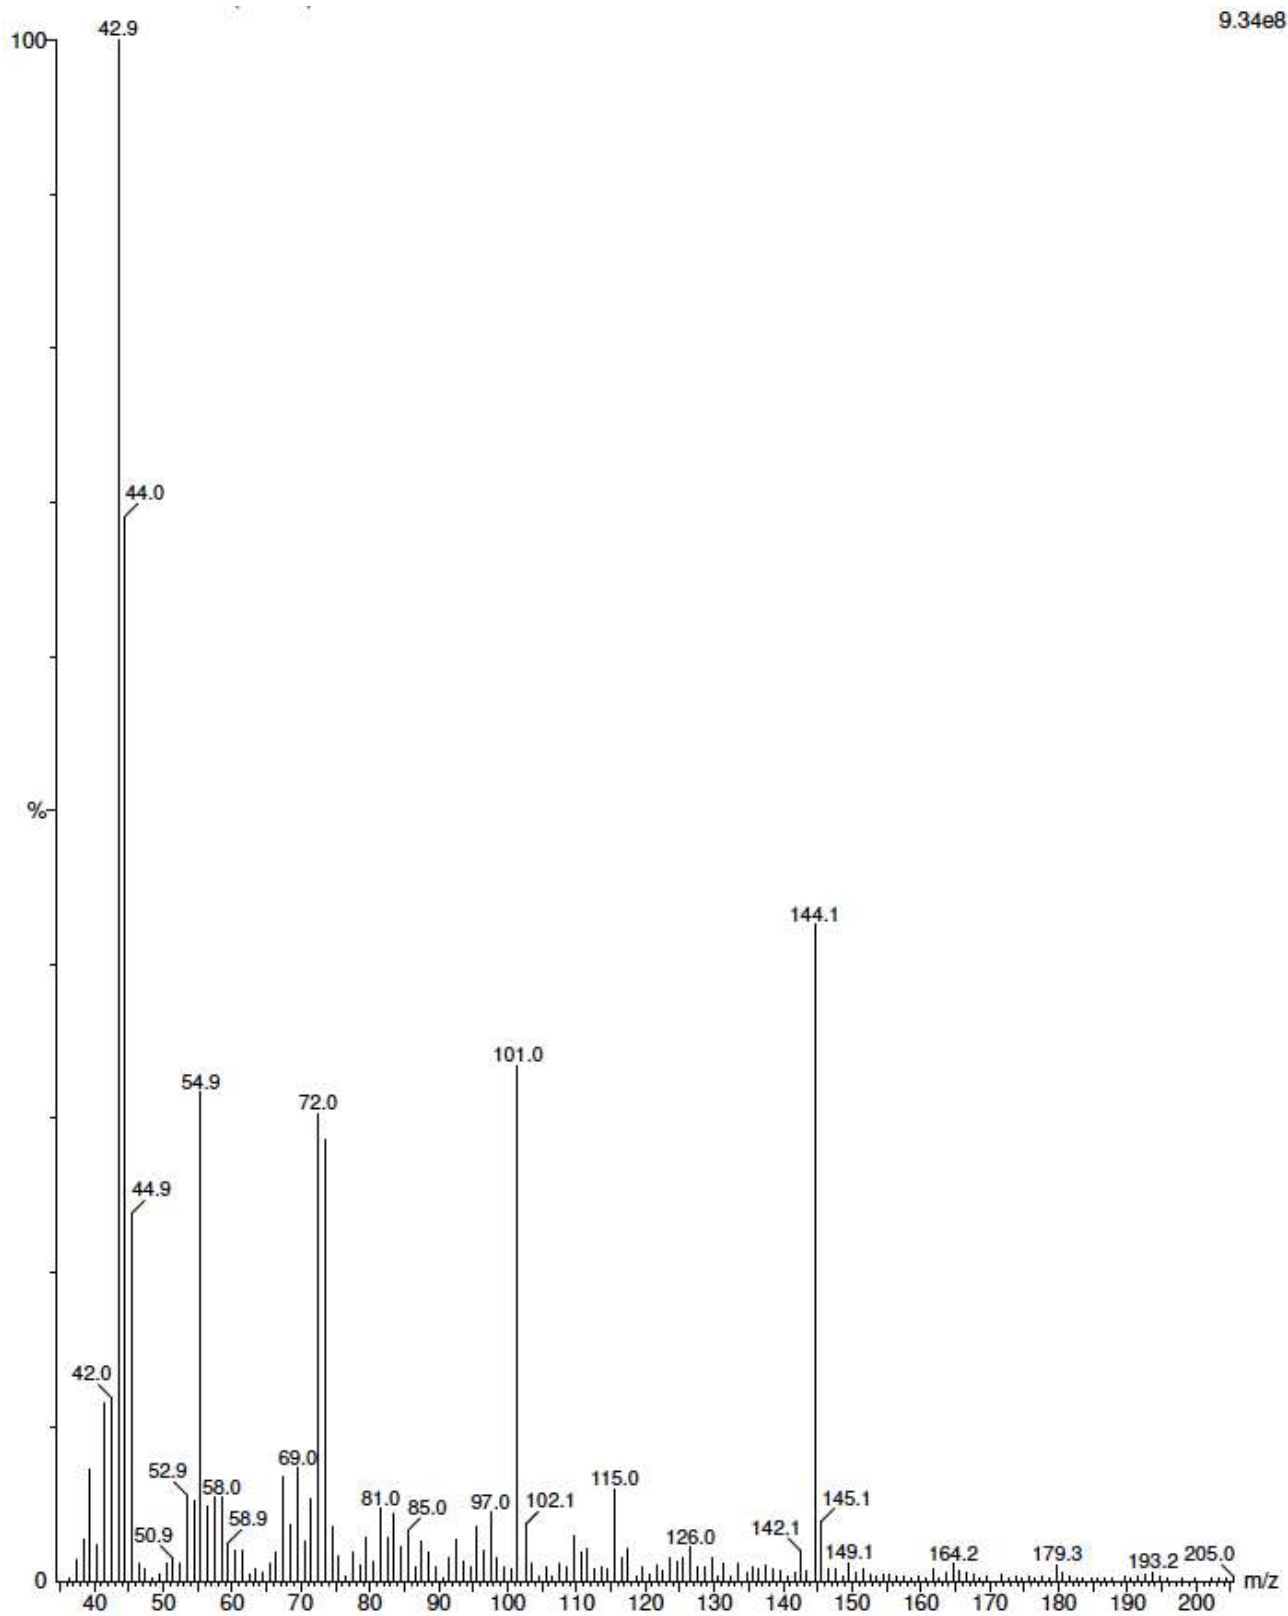

Figure S14
